**Title:** Assessment of Ultra Processed Foods consumption in Senegal: Validation of the Nova-UPF screener.

**Authors:** Saliou Diombo Kébé<sup>1\*</sup>, Adama Diouf<sup>1</sup>, Papa Mamadou Dit Doudou Sylla<sup>1,4</sup>, Kalidou Kane<sup>1</sup>, Caroline dos Santos Costa<sup>2</sup>, Fernanda Helena Marrocos Leite<sup>2</sup>, Giovanna Calixto Andrade<sup>2</sup>, Abdou Badiane<sup>1</sup>, Jean-Claude Moubarac<sup>3</sup>, Nicole Idohou-Dossou<sup>1</sup> and Carlos Augusto Monteiro<sup>2</sup>.

1. Laboratoire de Recherche en Nutrition et Alimentation Humaine (LARNAH), Faculté des Sciences et Techniques, Université Cheikh Anta Diop. BP 5005, Dakar – Fann, Sénégal; [labonut@ucad.edu.sn](mailto:labonut@ucad.edu.sn)
2. Center for Epidemiological Research in Nutrition and Health, School of Public Health, University of Sao Paulo, Brazil [nupens.usp@gmail.com](mailto:nupens.usp@gmail.com)
3. Département de Nutrition, Faculté de médecine, Université de Montréal. Montréal, Canada; [info-nutrition@umontreal.ca](mailto:info-nutrition@umontreal.ca)
4. Laboratoire des sciences Biologiques, Agronomiques, Alimentaires et de Modélisation des Systèmes complexes (LABAAM), UFR des Sciences Agronomiques, de l’Aquaculture et des Technologies Alimentaires, Université Gaston Berger de Saint-Louis. BP 234 Saint-Louis, Sénégal, [s2ata@ugb.edu.sn](mailto:s2ata@ugb.edu.sn)

\*Corresponding author: [salioudiombo.kebe@ucad.edu.sn](mailto:salioudiombo.kebe@ucad.edu.sn)

1 **Abstract:**

2 **Background:** Ultra-processed foods (UPF), as proposed by the Nova food classification  
3 system, are linked to the development of obesity and several non-communicable chronic  
4 diseases and deaths from all causes. The Nova-UPF screener developed in Brazil is a simple  
5 and quick tool to assess and monitor the consumption of these food products. The aim of this  
6 study was to adapt and validate, against the 24-hour dietary recall, this short food-based  
7 screener to assess UPF consumption in the Senegalese context.

8 **Methods:** The tool adaptation was undertaken using DELPHI methodology with national  
9 experts and data from a food market survey. The validation study was conducted in the urban  
10 area of Dakar in a sample of 301 adults, using as a reference the dietary share of UPF on the  
11 day prior to the survey, expressed as a percentage of total energy intake obtained via 24-hour  
12 recall. Association between the Nova-UPF score and the dietary share of UPF was evaluated  
13 using linear regression models. The Pabak index was used to assess the agreement in  
14 participants' classification according to quintiles of Nova-UPF score and quintiles of the  
15 dietary share of UPF.

16 **Results:** The results show a direct association ( $p\text{-value} < 0.001$ ) between intervals of the Nova-  
17 UPF score and the average dietary share of UPF. There was a near perfect agreement in the  
18 distribution of individuals according to score's quintiles and UPF dietary share quintiles (Pabak  
19 index = 0.84).

20 **Conclusion:** The study concluded that the score provided by the Nova-UPF screener adapted  
21 to the Senegalese context is a valid estimate of UPF consumption.

22

23 **Keywords:** Validation study; Questionnaire; Food consumption; Ultra-processed Foods;  
24 Senegal; Non-communicable disease; Nova classification, Diet Surveys, food classification  
25 systems.

## 26 **Introduction**

27 The Nova system classifies all foods and beverages according to the nature, extent and purpose  
28 of the industrial processes they undergo. Food processing includes all physical, biological, and  
29 chemical techniques used after food is extracted from production and before it is consumed or  
30 made into dishes and meals in kitchens [1]. Foods and beverages are classified according to the  
31 Nova system into four groups including Ultra-Processed Foods (UPF). UPF are defined as  
32 formulations of ingredients, mostly of exclusive industrial use, that result from a series of  
33 industrial processes. Ingredients include derived substances (e.g., emulsifiers, hydrogenated  
34 oils) with little or no whole foods to which flavours, colours and other cosmetic additives are  
35 added. As a group, UPF have a poor nutritional profile and share characteristics that favour  
36 overconsumption such as being hyperpalatable and addictive [2-3]. A meta-analysis involving  
37 many representative studies and several other epidemiological studies have shown the negative  
38 effect of high UPF consumption on the nutritional quality of diets [4] and the effective link  
39 between UPF consumption and the development of obesity and chronic non-communicable  
40 diseases (NCDs) such as type II diabetes, hypertension, cardiovascular diseases and all-cause  
41 mortality [5–9].

42 The consumption of UPF is rapidly increasing in low and middle-income countries (LMICs)  
43 and this transition, strongly linked to the industrialization, globalization and market  
44 deregulation of food systems, represents today a major threat to public health [10–12]. Such as  
45 for Senegal, which is facing a rise in the prevalence of overweight and obesity due to lifestyle  
46 changes, including sedentary lifestyle and physical inactivity, and unhealthy eating habits. In  
47 2015, the prevalence of overweight and obesity was 22.1% and 6.4%, respectively, among  
48 people aged 18 to 69 years. The prevalence of hypertension at national level was 29.8%, and  
49 19.2% and 2.1% of adults had hypercholesterolemia and type II diabetes, respectively in the  
50 same period [13].

51 The Senegalese public health system regularly conducts surveys to assess the state of  
52 malnutrition in all its forms, the dietary diversity and micronutrient intakes, but thus far none  
53 specifically addresses UPF consumption. Although investigation on UPF consumption and  
54 their effects on health in lower-income settings is urgent, researchers and policy makers can  
55 find it difficult to monitor consumption trends of UPF. This is mainly because assessing the  
56 dietary contribution of UPF using quantitative data, based on 24-hour recall or semi-  
57 quantitative food frequency data, is expensive, time consuming and complex to analyse. There  
58 is also a considerable lack of data on new dietary patterns and sales and/or consumption trends  
59 of ultra-processed foods in these contexts.

60 The Nova-UPF screener developed and validated in Brazil is a short food-based questionnaire  
61 that specifically addresses the consumption of UPF. It asks about UPF consumption ("yes" or  
62 "no" question) in the previous day and assigns a score ranging from 0 to 23 according to a list  
63 of 23 predefined UPF subcategories. It is a simple and quick tool to administer, requires a low  
64 workload, is easy to use and its application will allow the monitoring and evaluation of UPF  
65 consumption and possibly their impact on the development of obesity and diet-related NCDs  
66 [14–15]. The aim of this study was to describe the adaptation of the Nova-UPF screener to the  
67 Senegalese context and evaluate the performance of the score obtained by applying the adapted  
68 tool in comparison with the daily energy contribution of UPF obtained from 24-hour dietary  
69 recalls as a reference measure.

## 70 **2. Materials and Methods**

### 71 **2.1. Ethics**

72 This study received approval (Protocol SEN21/17 - 00000079MSAS/CNERS/SP) from the  
73 National Committee of Ethics for Research in Health (CNERS) of the Ministry of Health and  
74 Social Action (MSAS). Free and informed consent was obtained from the participants before  
75 starting the study.

## 76 2.2. Adaptation of the Nova-UPF Screener

77 The original version of the Nova-UPF screener was developed in Brazil and validated against  
78 a full 24-hour recall [15]. To be applicable in our context, the original content (Table 1) was  
79 adapted and tested to reflect Senegalese dietary patterns by the Human Nutrition and Food  
80 Research Laboratory (LARNAH) team and its partners, including researchers who worked on  
81 the development of the original version (Center for Epidemiological Research in Nutrition and  
82 Health, NUPENS). The changes made to the original version of the Nova-UPF screener were  
83 carried out through a collaborative process, led by the LARNAH research team with key  
84 stakeholders in the domains of nutrition, epidemiology, public health and food technology at  
85 national level. First, a literature review was performed on limited existing data, particularly  
86 Euromonitor reports of countries from the same economic zone and with a similar food  
87 environment (e.g., Ghana and Côte d'Ivoire) [16–17], to map the availability of UPF and carry  
88 out a first content adjustment. Then, two virtual workshops and individual consultation sessions  
89 involving the aforementioned stakeholders were organised (further details below). During the  
90 workshops, the DELPHI method was applied, which aims to gather expert opinions on a  
91 specific subject and to highlight convergences and consensus on the orientations to be given to  
92 a project by subjecting these experts to successive waves of questions, was applied [18].

93 Table 1: Original version of the Nova-UPF screener

| N° | Subcategories                                                |
|----|--------------------------------------------------------------|
| 1  | Regular or Diet soda                                         |
| 2  | Fruit juice or fruit drink in can or box                     |
| 3  | Fruit drink prepared from a powdered mix                     |
| 4  | Chocolate milk in can or box or prepared from a powdered mix |
| 5  | Tea or coffee in can or box or prepared from a powdered mix  |
| 6  | Any type of flavored yogurt                                  |
| 7  | Sausage, hamburger or nuggets                                |
| 8  | Ham, salami or bologna                                       |

---

|    |                                                                   |
|----|-------------------------------------------------------------------|
| 9  | Bun, roll or any type of packaged bread                           |
| 10 | Margarine                                                         |
| 11 | Branded mayonnaise, ketchup, or mustard                           |
| 12 | Branded salad dressing                                            |
| 13 | Frozen French fries or from fast-food restaurants                 |
| 14 | Frozen pizza or from fast-food restaurants                        |
| 15 | Instant noodles or instant powdered soup                          |
| 16 | Frozen lasagna or any other frozen ready meal                     |
| 17 | Potato chips, crackers or any other type of packaged salty snacks |
| 18 | Cookies or biscuits with or without filling                       |
| 19 | Branded cake or muffin (not homemade or artisanal)                |
| 20 | Cereal bar                                                        |
| 21 | Branded ice cream or ice lolly (not homemade or artisanal)        |
| 22 | Chocolate bar or chocolate candies                                |
| 23 | Sugary breakfast cereals                                          |

---

94 Source: Caroline et al. (2021).

95 The first virtual workshop carried out in June 2021 with over 20 national stakeholders was  
96 conducted to i) present the Nova-UPF screener to the audience and ii) define the guidelines for  
97 adapting the original content of the Nova-UPF screener to the Senegalese context. These  
98 included finding resources to fill the data gap on UPF consumption in the country and to define  
99 a methodological approach to revise the proposed subcategories. As a result, we implemented  
100 a market survey to characterise the food supply in Dakar (the capital of Senegal) and capture  
101 the diversity and main types of ultra-processed foods available in the food environment. The  
102 Dakar region concentrates most of the economic activity, flow of food products to the rest of  
103 the country, and all major distribution chains [19]. More than 4,700 types of packaged food  
104 products, of which more than 70% was ultra-processed, were listed and classified into different  
105 subcategories.

106 Following the first virtual workshop, individual one-hour consultations were held with experts  
107 to directly obtain their opinions and suggestions on the content to be adapted (e.g., what types

108 of UPF, which brands or examples should be included). The results of these interviews and  
109 data from the market survey were used to develop a first adapted content proposal. The second  
110 workshop carried out in September 2021 with the same stakeholders reviewed the suitability  
111 of selected UPF subcategories and examples of products included in each subcategory to ensure  
112 that they were relevant to the Senegalese context. Following this second consultation with  
113 national experts, the final content of the Nova-UPF screener for Senegal was obtained.  
114 Before implementing the tool, face-validity was assessed to evaluate the tool's design, content,  
115 structure, and ease of understanding. The Nova-UPF screener in its original design is a self-  
116 administered questionnaire where the respondent reads the names of the subcategories and  
117 checks the answers. However, given the low level of literacy and linguistic diversity, the Nova-  
118 UPF screener for Senegal was completed with the assistance of a trained interviewer who could  
119 explain the tool to respondents, and the meaning of each UPF subcategory, when necessary. In  
120 this phase, an electronic questionnaire was designed to allow interviewers to personally assess,  
121 after each question (subcategory): i) whether the wording of the requested subcategory was  
122 well understood and ii) whether the respondent had no difficulty in answering. Then,  
123 participants were asked: i) whether he/she had understood the meaning of each subcategory, ii)  
124 whether the proposed UPF subcategories corresponded to the food products to which they were  
125 often exposed, iii) whether the examples used were clear and well recognised. Based on these  
126 results, further minor adjustments to the phrasing of the questions were made. From the original  
127 version, several changes were made. These included rewording of subcategory names, the  
128 splitting or grouping of certain subcategories and the introduction of new subcategories. In  
129 Figure 1, we have a summary of the changes made from the original version. Like the original  
130 tool, the Nova-UPF screener for Senegal also presents 23 subcategories. Foods were grouped  
131 within the same subcategory according to their composition or use. At the end of the adaptation

132 phase and content validation (face-validity), a final version of the Nova-UPF screener adapted  
 133 for Senegal was obtained (see Table 2).

| <u>Original</u>                                              |    | <u>Adapted</u>                                                                                              |
|--------------------------------------------------------------|-------------------------------------------------------------------------------------|-------------------------------------------------------------------------------------------------------------|
| Chocolate milk in can or box or prepared from a powdered mix |    | Instant milk powder or instant chocolate powder                                                             |
| Tea or coffee in can or box or prepared from a powdered      |    | Iced or flavoured tea, coffee milk or flavoured milk in a can or bottle or prepared from a powdered mixture |
| Any type of flavored yogurt                                  |    | Any type of flavoured yoghurt or industrial curdled milk                                                    |
| Sausage, hamburger or nuggets<br>Ham, salami or bologna      |   | Processed meats or meat spreads or nuggets                                                                  |
| Branded salad dressing                                       |  | Bouillons, Dipping Sauce, vinaigrette or industrial salad dressing                                          |
| Frozen French fries or from fast-food restaurants            |  | Frozen fries or frozen pizza                                                                                |
| Frozen pizza or from fast-food restaurants                   |                                                                                     |                                                                                                             |
| Frozen lasagna or any other frozen ready meal                |  | Any frozen ready-to-eat meal                                                                                |
| Cereal bar                                                   |  | Chocolate bars, chocolate candies, confectionery or chewy products                                          |
| Chocolate bar or chocolate candies                           |                                                                                     |                                                                                                             |
| <b><u>Three (3) new categories</u></b>                       |                                                                                     |                                                                                                             |
| Industrial jams or marmalades                                | Chocolate or hazelnut paste spreads                                                 | Spreadable cheese                                                                                           |

134  
 135 Instant milk powder: in Senegal, the great majority of instant milk powders available on the market are ultra-processed due to the presence of  
 136 additives.  
 137

Figure 1: Summary of changes to the original content

138



139 Table 2: Final adapted version

| N° | Subcategories                                                                                               | Code   |
|----|-------------------------------------------------------------------------------------------------------------|--------|
| 1  | Soda, energizing or diet beverages                                                                          | CAT 01 |
| 2  | Flavoured drinks, concentrates and/or fruit nectars in a can or box                                         | CAT 02 |
| 3  | Fruit-flavoured drinks prepared from a powdered mixture                                                     | CAT 03 |
| 4  | Instant milk powder or instant chocolate powder                                                             | CAT 04 |
| 5  | Iced or flavoured tea, coffee milk or flavoured milk in a can or bottle or prepared from a powdered mixture | CAT 05 |
| 6  | Any type of flavoured yoghurt or industrial curdled milk                                                    | CAT 06 |
| 7  | Processed meats or meat spreads or nuggets                                                                  | CAT 07 |
| 8  | Bread, rusks, any other type of packaged industrial bread                                                   | CAT 08 |
| 9  | Frozen fries or frozen pizza                                                                                | CAT 09 |
| 10 | Margarine                                                                                                   | CAT 10 |
| 11 | Industrial jams or marmalades                                                                               | CAT 11 |
| 12 | Chocolate or hazelnut paste spreads                                                                         | CAT 12 |
| 13 | Spreadable cheese                                                                                           | CAT 13 |
| 14 | Industrial mayonnaise, ketchup or mustard                                                                   | CAT 14 |
| 15 | Bouillons, Dipping Sauce, vinaigrette or industrial salad dressing                                          | CAT 15 |
| 16 | Instant soup powder or instant noodles                                                                      | CAT 16 |
| 17 | Any frozen ready-to-eat meal                                                                                | CAT 17 |
| 18 | Chips, crackers, or any other type of packaged salty snack                                                  | CAT 18 |
| 19 | Cookies or biscuits with or without fillings                                                                | CAT 19 |
| 20 | Industrial cakes, muffins, or pastries                                                                      | CAT 20 |
| 21 | Sweetened breakfast cereals                                                                                 | CAT 21 |
| 22 | Industrial ice cream or popsicles                                                                           | CAT 22 |
| 23 | Chocolate bars, chocolate candies, confectionery or chewy products                                          | CAT 23 |

140

## 141 **2.3. Validation of the Nova-UPF Screener**

### 142 **2.3.1. Design and selection of participants**

143 The validation study involved adults aged 18 years and older, living in urban areas of Dakar,  
144 which concentrates nearly a quarter of the national population and almost half of the country's  
145 urban population (49.6%) [20]. For validation studies, higher numbers of subjects will provide

146 better estimates of reproducibility or validity and a sample size of at least 50 to 100 subjects is  
147 recommended [21].

148 A two-stage random sampling design was used. First, a random selection was taken in 25 urban  
149 census districts (CD), spread across nine (9) health districts in Dakar's medical region. Second,  
150 12 households were randomly selected in each CD (13 in one of them), by using a sampling  
151 step defined according to the size of the CD. Finally, in each household, one adult was  
152 randomly selected, taking into account a 50/50 balance between men and women. In total, 301  
153 adults were enrolled to participate in this study.

### 154 **2.3.2. Data collection**

155 The data collection was carried out on December 2021, by experienced nutritionists and  
156 investigators who were trained in the use of the Nova-UPF screener and quantitative 24h recall.  
157 All participants were informed about the aim of the study and invited to join after agreeing to  
158 participate by signing the consent form. Then sociodemographic and food consumption data  
159 (Nova-UPF screener and 24-hour recall) were collected. The electronic questionnaire was  
160 deployed in tablets using the ODK application for data collection (socio-demographic and food  
161 consumption), where the 23 subcategories were listed along with a descriptive text of the  
162 category and illustrative images as shown in Figure 2. Images corresponding to the mentioned  
163 brands were selected taking into account the different forms of packaging (bottle, can, brick  
164 sachet, box etc.).

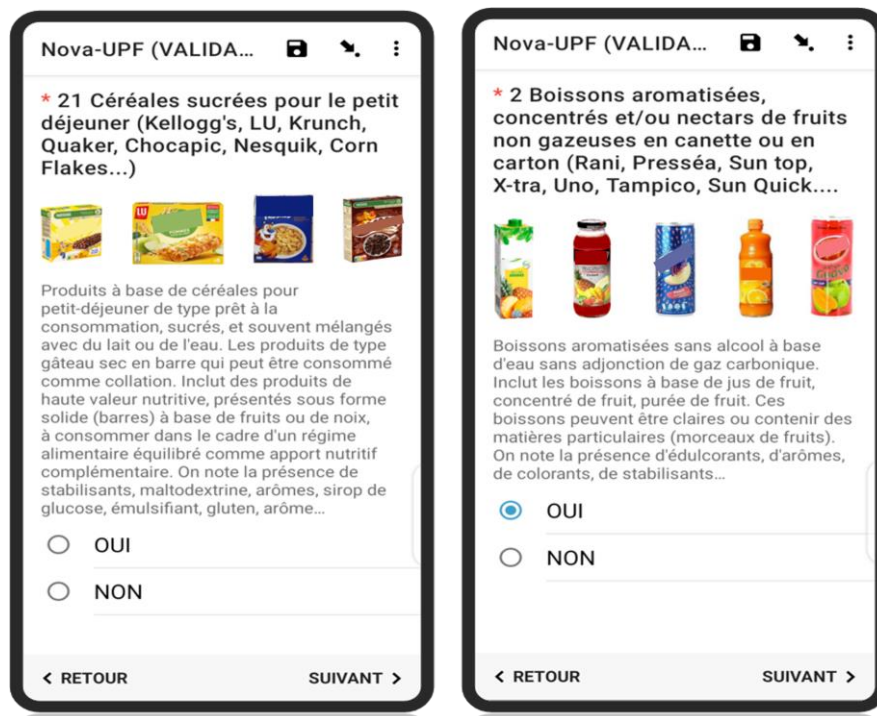

165

166

Figure 2: Electronic version of the Nova-UPF screener for Senegal.

167 The Nova-UPF screener was administered first, for an average time of five minutes. After  
168 completion of the tool, investigators conducted the 24-hour dietary recall, where participants  
169 informed about all foods and drinks and beverages, and total amount consumed on the day  
170 before.

171 The 24-hour dietary recall was conducted using the automated multiple-pass method [22]. First,  
172 participants report, in a rapid and uninterrupted manner, all foods and beverages consumed.  
173 Next, the interviewer asks, from an initial list of often forgotten foods, what other foods or  
174 beverages the respondent might have omitted to report. The participant is then asked about the  
175 type, time and place of each meal, and then provides details such as the method of preparation,  
176 quantities and the addition of other foods (e.g., sugar, salt, etc.). Finally, the interviewer lists  
177 all the foods previously reported by the respondent, reviewing any omissions. Given local food  
178 habits, where people are used to eat the main meals together around the same bowl, the quantity  
179 of food or meals consumed was estimated by direct weighing (if a replica was available in the  
180 household), by non-standard measurements (e.g., slice, unit, tablespoon, bag, handful, etc.), or

181 by using substitutes (water, dry millet, modelling paste) to get the weight that refer to the  
182 volume occupied by the amount of food consumed.

#### 183 **2.4. Data analysis**

184 The Nova-UPF score of each participant, which corresponds to the total number of  
185 subcategories (from 0 to 23) consumed on the day before, was calculated. To estimate the  
186 dietary share of UPF, each food reported in the 24-hour recall was first classified according to  
187 the Nova food classification system as 1) unprocessed or minimally processed, 2) processed  
188 culinary ingredients, 3) processed foods or 4) ultra-processed foods [1–2]. Then, the real  
189 amount consumed of each food was obtained using the database of food conversion factors and  
190 the Senegalese standard recipe database, developed under the national food consumption  
191 survey implemented by *Consortium pour la Recherche Économique et Sociale* (CRES) in  
192 collaboration with LARNAH, the Ministry of Health and the Food and Agriculture  
193 Organization of the United Nations in Senegal (FAO-Senegal). These conversion factors are  
194 coefficients that allow us to move from non-standard measurements or substitute quantities to  
195 real quantities of food. The amount of each food (in grams) was converted to calories using the  
196 2019 West African Food Composition Table [23] and the CIQUAL 2020 Nutritional Food  
197 Composition Table [24]. Finally, for each person, we calculated the total calories consumed on  
198 the day prior to the interview, including the total calories from UPF and also the percentage of  
199 calories from UPF.

200 To test the association between the score provided by the Nova-UPF screener and the dietary  
201 share of UPF obtained from the 24-h recall two methods were used. First, the variation in the  
202 average percentage of calories from UPF was examined according to the changes in the score  
203 quintiles on a continuous basis and also by comparing the quintiles of distribution of the two  
204 variables. In both cases, linear regression models were used to estimate the association. The  
205 level of agreement between the quintiles for the score and the percentage of calories from UPF

206 was assessed by calculating the prevalence and bias-adjusted Kappa index (Pabak) [25]. Values  
207 greater than 0.80 indicate near-perfect agreement; between 0.61 and 0.80, substantial  
208 agreement; between 0.41 and 0.60, moderate; between 0.21 and 0.40, fair; and equal to or less  
209 than 0.20, slight [26]. Data analyses were performed with the Stata® 16.1 software and the  
210 Pabak index was calculated using R Studio software.

## 211 3. Results

### 212 3.1. Socio-demographic characteristics

213 The Sociodemographic characteristics of participants are described in Table 3. The mean age  
214 of subjects was  $42 \pm 14$  years. All 301 volunteers in this study were aged between 20 and 68  
215 years, and the most represented age group was those of 20-39 years. More than half of  
216 individuals were married (61.5%) and had reached high school or university (52.8%).  
217 Regarding their occupation, 22.9% were in the trade sector, and 11% were unemployed,  
218 including 18.7% of women.

219 Table 3: Socio-demographic characteristics (n=301). Senegal (2021).

|                           | <b>Total<br/>(n= 301)</b> | <b>Men<br/>(n= 151)</b> | <b>Women<br/>(n= 150)</b> |
|---------------------------|---------------------------|-------------------------|---------------------------|
| <b>Mean age</b>           | 42 ± 14                   | 41 ± 14                 | 43 ± 15                   |
| <b>Age group</b>          |                           |                         |                           |
| 20 – 39                   | 49.5 (149)                | 55 (83)                 | 44 (66)                   |
| 40 – 59                   | 34.2 (103)                | 31.1 (47)               | 37.3 (56)                 |
| 60 – 68                   | 16.3 (49)                 | 13.9 (21)               | 18.7 (28)                 |
| <b>Literacy</b>           | 77.1 (232)                | 82.8 (125)              | 71.3 (107)                |
| <b>Level of Education</b> |                           |                         |                           |
| Primary school            | 21.6 (65)                 | 13.9 (21)               | 29.3 (44)                 |
| College / high school     | 24.2 (73)                 | 26.5 (40)               | 22 (33)                   |
| University                | 28.6 (86)                 | 25.8 (39)               | 31.4 (47)                 |
| Vocational school         | 16.3 (49)                 | 21.2 (32)               | 11.3 (17)                 |
| Others                    | 9.3 (28)                  | 12.6 (19)               | 6 (9)                     |
| <b>Marital status</b>     |                           |                         |                           |

---

|                    |            |           |           |
|--------------------|------------|-----------|-----------|
| Single             | 23.6 (71)  | 31.1 (47) | 16 (24)   |
| Divorced           | 4.6 (14)   | 3.3 (5)   | 6 (9)     |
| Married monogamous | 51.5 (155) | 55 (83)   | 48 (72)   |
| Married polygamous | 14 (42)    | 10.6 (16) | 17.3 (26) |
| Widow(er)          | 6.3 (19)   | 0 (0)     | 12.7 (19) |
| <b>Occupation</b>  |            |           |           |
| Unemployed         | 11 (33)    | 3.3 (5)   | 18.7 (28) |
| Student            | 9.6 (29)   | 8.6 (13)  | 10.7 (16) |
| Manual worker      | 7 (21)     | 13.3 (20) | 0.7 (1)   |
| Trader             | 22.9 (69)  | 13.3 (20) | 32.7 (49) |
| Housekeeper        | 11.6 (35)  | 2 (3)     | 21.3 (32) |

---

220 The results are expressed as percentages with the effective (n) or mean  $\pm$  SD.

### 221 **3.2. UPF consumption and distribution of the Nova-UPF score**

222 As described in Figure 3, the most consumed UPF subcategories were Bouillons, dipping  
223 sauce, vinaigrette or industrial salad dressings (32.5%); Industrial mayonnaise, ketchup or  
224 mustard (26.3%); Instant milk powder or instant chocolate powder (14.5%); Margarine (6.6%),  
225 and Chocolate bars, chocolate candies, confectionery or chewy products (4.9%). Overall, no  
226 products belonging to the subcategories Fruit-flavoured drinks prepared from a powdered  
227 mixture (CAT 03); Industrial jams or marmalades (CAT 11); and Industrial ice cream or  
228 popsicles (CAT 22) were consumed by our study sample.

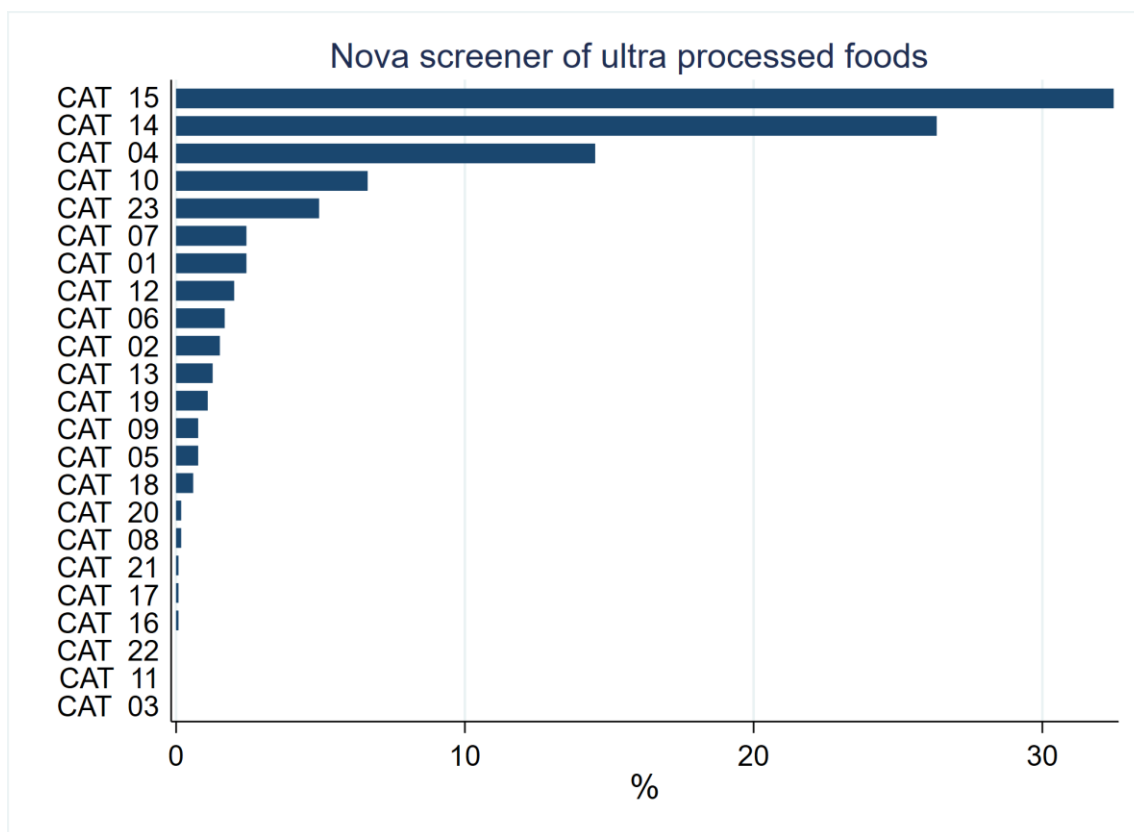

229

230

Figure 3: Consumption frequencies of ultra-processed food subcategories.

231

The Nova scores ranged from zero (0) to eight (8) (Figure 4). The majority of participants got scores of 3 (28.6%), 2 (27.2%), 1 (20.3%), and 4 (13.3%). Only one individual (0.3%) had a score of zero and 10.3% of individuals had a score of 5 or higher ( $\geq 5$ ).

232

233

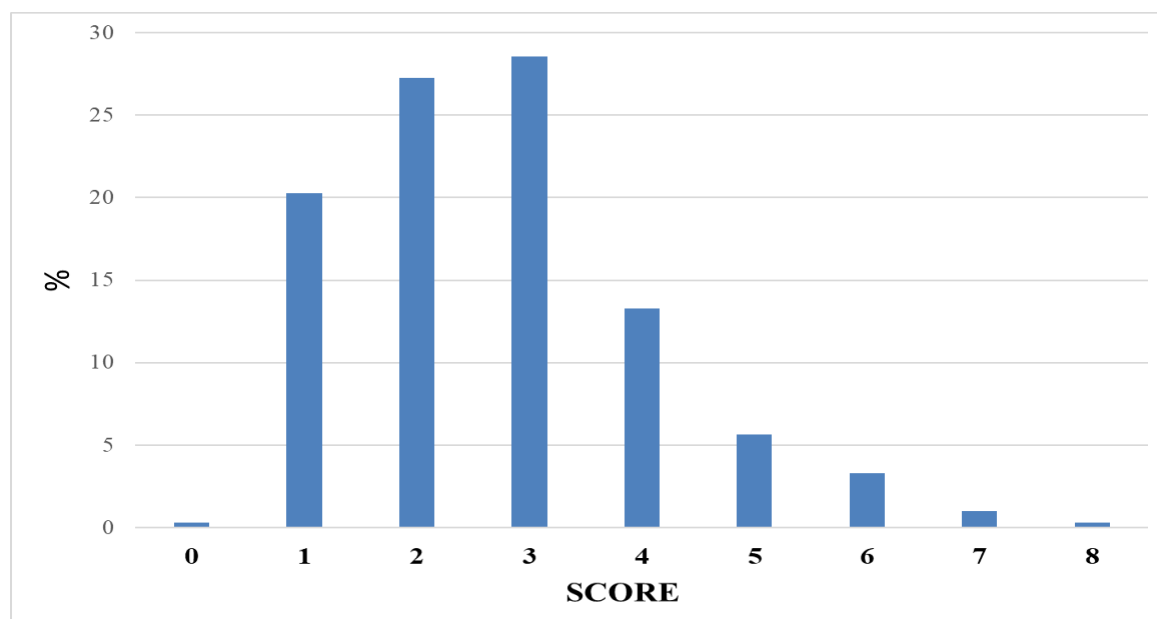

234

235

Figure 4: Nova-UPF score distribution.

### 236 3.3. Dietary share of ultra-processed foods according to Nova score intervals

237 Overall, the average contribution of UPF to daily energy intake was 17.4% (CI= 18.5 - 21.3).

238 The results showed that the dietary share of UPF consumption increased linearly with the

239 increase in the intervals of the Nova-UPF score (p-value for linear trend <0001) (Figure 5).

240 Individuals in the first quintile had a mean energy contribution from UPF lower than 3%, while

241 the mean energy contribution from UPF for those in the fifth quintile was more than 30%.

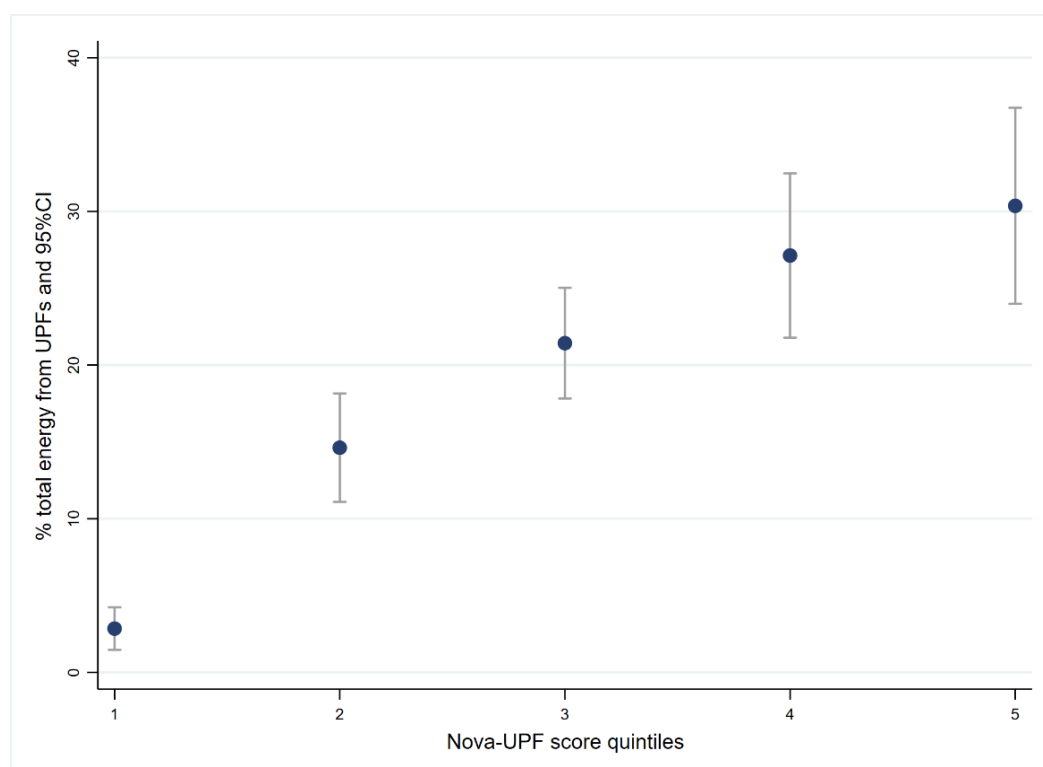

242

243 Figure 5: Mean dietary share of UPF obtained from full 24-h recall according to Nova-UPF

244 score intervals

### 245 3.4. Agreement between the Nova-UPF Screener and the 24-hour dietary recall

246 Table 4 shows the distribution of individuals according to quintiles of the Nova-UPF score and

247 quintiles of energy contribution from UPF. The Pabak index value was 0.84 (0.68 - 1). This

248 indicates an almost perfect agreement (>0.80) between the two criteria, the Nova-UPF score

249 and the 24-hour dietary recall.

250 Table 4: Distribution of individuals by score quintiles and UPF energy contribution quintiles.



|                     | 1     | 2     | 3     | 4     | 5     | Total  |
|---------------------|-------|-------|-------|-------|-------|--------|
| Q1 ( $\leq 2.18$ )  | 15.28 | 4.32  | 0.33  | 0.33  | 0.33  | 20.60  |
| Q2 (2.19 – 10.89)   | 3.65  | 11.96 | 8.97  | 2.33  | 0.33  | 27.24  |
| Q3 (10.90 – 26.80)  | 1.33  | 6.64  | 10.96 | 4.98  | 4.65  | 28.57  |
| Q4 (26.81 – 41.53)  | 0.33  | 1.66  | 5.98  | 2.99  | 2.33  | 13.29  |
| Q5 ( $\geq 41.54$ ) | 0.00  | 2.66  | 2.33  | 2.66  | 2.66  | 10.30  |
| Total               | 20.60 | 27.24 | 28.57 | 13.29 | 10.30 | 100.00 |

Pabak index (Kappa adjusted for prevalence bias) = 0.84

251

#### 252 **4. Discussion**

253 Results of this study show a linear positive association ( $P < 0.001$ ) between the score obtained  
254 with the Nova-UPF screener for Senegal and the dietary share of UPF obtained from the full  
255 24-hour dietary recall, as the reference method. There was near-perfect agreement between the  
256 score quintiles distribution of individuals and the UPF energy contribution quintiles.

257 The average percentage of calories provided by UPF (17.4%) was similar to that reported in  
258 France (17.4%) [27] and in Brazilian adults (17.7%) [28], and to other studies in Colombia  
259 (15.9%) [29] and Spain (17.3%) [30]. This reflects that consumption of these products occurs  
260 regardless of differences in dietary habits and economic development between countries.  
261 However, UPF consumption in the Senegalese context is still much lower than the rates  
262 reported in the USA [31], Canada [32], and Great Britain [8], where the availability of these  
263 products in the food supply is much higher [10 – 33].

264 The most consumed UPF category was "Bouillons, dipping sauce, vinaigrette or industrial  
265 salad dressings". This is due to the presence of bouillons in this category, which is widely  
266 consumed by the majority (90%) of the Senegalese households' [34], to enhance the taste of  
267 prepared dishes. The same happens for the category of salty sauces (Industrial mayonnaise,  
268 ketchup or mustard). The frequency of use of foods belonging to the categories "Instant milk  
269 powder or instant chocolate powder" and "Margarine" is mainly due to the habit of people to  
270 consume instant milk powder with coffee in the morning and bread coated with margarine, for

271 breakfast. The consumption of "Chocolate bars, chocolate candies, confectionery or chewy  
272 products" is mostly due to snacking behaviour between meals, especially among younger  
273 people.

274 The absence of consumption of 'Industrial ice cream or popsicles' could be attributed to the  
275 data collection period, which took place in winter, whereas these products are generally more  
276 consumed during hot weather (summer). Despite their high availability on the market, it  
277 appeared that 'Fruit-flavoured drinks prepared from a powdered mixture' and 'Industrial jams  
278 or marmalades' were not consumed by our study sample. This may be due to the fact that we  
279 have not caught profiles of people who consume these products, or because their consumption  
280 is more common in areas other than those covered by our study (e.g., rural or peri-urban).  
281 Applying the Nova tool at national level will give us a clearer assessment on consumption of  
282 all categories, and possibly allow us to adjust the adapted content further on.

283 The scores obtained and their distribution were very similar to results from the validation tool  
284 in Brazil. Indeed, in both studies, the most common scores were 1, 2, 3, and 4 [15]. However,  
285 the average percentage of energy contribution according to the score quintiles was lower for  
286 Senegal. It varied between 2.8% for the first quintile and 30.4% for the fifth quintile, while the  
287 Brazilian average contribution varied between 19.3% and 43.9%, respectively [15]. When  
288 considering the distribution of individuals according to Nova score quintiles and quintiles of  
289 energy contribution of UPF, the agreement between the Nova-UPF screener for Senegal and  
290 the 24h recall is higher in the first three quintiles, while the original Brazilian tool highlights  
291 more the extreme quintiles (first and fifth). These differences could be explained by the  
292 difference in dietary patterns and food culture between Senegal and Brazil, and the sample  
293 characteristics, such as age, sex, and education level, which can influence the consumption of  
294 UPF in quantity and variety.

295 Beyond the significant association, the concordance expressed through the Pabak index is  
296 better for the adapted version in Senegal compared to the original one [15]. Adaptation from a  
297 predefined original content allows for a more precise and exhaustive adjustment of the tool's  
298 content. This suggests good results when considering that the Nova-UPF screener can be  
299 adapted in other countries, or its content can be updated in the future, according to changes in  
300 dietary habits.

301 The sample size of this study is unrepresentative, but this has no impact on the results because  
302 this study compares two methods to estimate UPF consumption in the same population. It was  
303 conducted based on probability sampling with a balanced sex-ratio population whose socio-  
304 demographic characteristics (level of education, age, profession, etc.) cover the entire  
305 concerned population. This is the first study on food consumption in Senegal using the Nova  
306 food classification and gives a relatively good idea of what the situation could be at the national  
307 level.

## 308 **5. Conclusions**

309 The Nova-UPF screener for Senegal is valid for measuring and monitoring the consumption of  
310 ultra-processed foods at the population level and over time. The score obtained with this tool  
311 accurately reflects the level of energy intake from these targeted foods. However, it will be  
312 necessary to perform this tool on a larger sample to better appreciate its applicability in  
313 nutritional surveillance and monitoring system.

314

315

316

317

318

319

## 320 **References**

- 321 1. Monteiro CA, Cannon G, Moubarac JC, Levy RB, Louzada MLC, Jaime PC. The UN  
322 Decade of Nutrition, the NOVA food classification and the trouble with ultra-processing.  
323 Public Health Nutr. 2018;21:5–17.
- 324 2. Monteiro CA, Cannon G, Levy RB, Moubarac J-C, Louzada MLC, Rauber F, et al. Ultra-  
325 processed foods: what they are and how to identify them. Public Health Nutr. 2019;22:936-  
326 41.
- 327 3. LaFata EM, Gearhardt AN. Ultra-Processed Food Addiction: An Epidemic? Psychother  
328 Psychosom. 2022;91:363-72.
- 329 4. Martini D, Godos J, Bonaccio M, Vitaglione P, Grosso G. Ultra-Processed Foods and  
330 Nutritional Dietary Profile: A Meta-Analysis of Nationally Representative Samples.  
331 Nutrients. 2021;13:3390.
- 332 5. Rauber F, Chang K, Vamos EP, Louzada MLC, Monteiro CA, Millett C, Levy RB. Ultra-  
333 processed food consumption and risk of obesity: a prospective cohort study of UK  
334 Biobank. Eur J Nutr. 2021;60:2169-80.
- 335 6. Llaveró-Valero M, Escalada-San Martín J, Martínez-González MA, Basterra-Gortari FJ,  
336 de la Fuente-Arrillaga C, Bes-Rastrollo M. Ultra-processed foods and type-2 diabetes risk  
337 in the SUN project: A prospective cohort study. Clin Nutr. 2021;40:2817-24.
- 338 7. Machado PP, Steele EM, Levy RB, da Costa Louzada ML, Rangan A, Woods J, et al.  
339 Ultra-processed food consumption and obesity in the Australian adult population. Nutr  
340 Diabetes. 2020;10:39.
- 341 8. Pagliai G, Dinu M, Madarena MP, Bonaccio M, Iacoviello L, Sofi F. Consumption of  
342 ultra-processed foods and health status: a systematic review and meta-analysis. Br J Nutr.  
343 2021;125:308-18.

- 344 9. Suksatan W, Moradi S, Naeini F, Bagheri R, Mohammadi H, Talebi S, et al. Ultra-  
345 Processed Food Consumption and Adult Mortality Risk: A Systematic Review and Dose–  
346 Response Meta-Analysis of 207,291 Participants. *Nutrients*. 2021;14:174.
- 347 10. Vandevijvere S, Jaacks LM, Monteiro CA, Moubarac J-C, Girling-Butcher M, Lee AC, et  
348 al. Global trends in ultra-processed food and drink product sales and their association with  
349 adult body mass index trajectories. *Obes Rev*. 2019;20:10-19.
- 350 11. Baker P, Machado P, Santos T, Sievert K, Backholer K, Hadjidakou M, et al. Ultra-  
351 processed foods and the nutrition transition: Global, regional and national trends, food  
352 systems transformations and political economy drivers. *Obes Rev*. 2020;21:e13126.
- 353 12. Moodie R, Bennett E, Kwong E JL, Santos T, Pratiwi L, Williams J, Baker P. Ultra-  
354 Processed Profits: The Political Economy of Countering the Global Spread of Ultra-  
355 Processed Foods – A Synthesis Review on the Market and Political Practices of  
356 Transnational Food Corporations and Strategic Public Health Responses. *Int J Health*  
357 *Policy Manag*. 2021;10:968-82.
- 358 13. Agence Nationale de la Statistique et de la Démographie (ANSD). Enquête nationale sur  
359 les facteurs de risques des maladies non transmissibles (STEPS). Sénégal: Ministère de la  
360 Santé et de l’Action Sociale; 2015.
- 361 14. Sattamini IF. Instrumentos de avaliação da qualidade de dietas: desenvolvimento,  
362 adaptação e validação no Brasil. [PhD thesis]. São Paulo: Universidade de São Paulo;  
363 2019.
- 364 15. Costa CS, Faria FR, Gabe KT, Sattamini IF, Khandpur N, Leite FHM, et al. Nova score  
365 for the consumption of ultra-processed foods: description and performance evaluation in  
366 Brazil. *Rev. saúde pública*. 2021;55:13.
- 367 16. Euromonitor International. Packaged Food in Ghana. Passport, 2019.
- 368 17. Euromonitor International. Packaged Food in Côte d’Ivoire. Passport, 2019.

- 369 18. De Villiers MR, De Villiers PJ, Kent AP. The Delphi technique in health sciences  
370 education research. *Med Teach*. 2005;27:639-43.
- 371 19. Agence Nationale de la Statistique et de la Démographie (ANSD). Situation économique  
372 et sociale régionale 2019. Sénégal: ANSD; 2021.
- 373 20. Agence Nationale de la Statistique et de la Démographie (ANSD). Rapport définitif  
374 Recensement Général de la Population et de l'Habitat, de l'Agriculture et de l'Elevage  
375 (RGPHAE). Sénégal: ANSD; 2013.
- 376 21. Cade J, Thompson R, Burley V, Warm D. Development, validation and utilisation of food-  
377 frequency questionnaires – a review. *Public Health Nutr*. 2002;5:567-87.
- 378 22. Moshfegh AJ, Rhodes DG, Baer DJ, Murayi T, Clemens JC, Rumpler WV, et al. The US  
379 Department of Agriculture Automated Multiple-Pass Method reduces bias in the collection  
380 of energy intakes. *Am J Clin Nutr*. 2008;88:324-32.
- 381 23. Vincent A, Grande F, Compaoré E, Amponsah Annor G, Addy PA, Aburime LC, et al.  
382 FAO/INFOODS Food Composition Table for Western Africa (2019) User Guide &  
383 Condensed Food Composition Table. Rome: FAO; 2020.
- 384 24. CIQUAL. Table de composition nutritionnelle des aliments. 2020. <https://ciqual.anses.fr>.  
385 Accessed on 24 October 2022.
- 386 25. Byrt T, Bishop J, Carlin JB. Bias, prevalence and kappa. *J Clin Epidemiol*. 1993;46:423-  
387 9.
- 388 26. Landis JR, Koch GG. The Measurement of Observer Agreement for Categorical Data.  
389 *Biometrics*. 1977;33:159-74.
- 390 27. Srour B, Fezeu LK, Kesse-Guyot E, Allès B, Méjean C, Andrianasolo RM, et al. Ultra-  
391 processed food intake and risk of cardiovascular disease: prospective cohort study  
392 (NutriNet-Santé). *BMJ*. 2019;365:11451.

- 393 28. Cattafesta M, Petarli GB, Zandonade E, Bezerra OMPA, Abreu SMR, Salaroli LB. Energy  
394 contribution of NOVA food groups and the nutritional profile of the Brazilian rural  
395 workers' diets. PLoS ONE. 2020;15:e0240756.
- 396 29. Khandpur N, Cediel G, Obando DA, Jaime PC, Parra DC. Sociodemographic factors  
397 associated with the consumption of ultra-processed foods in Colombia. Rev. saúde pública.  
398 2020;54:19.
- 399 30. Sandoval-Insausti H, Jiménez-Onsurbe M, Donat-Vargas C, Rey-García J, Banegas JR,  
400 Rodríguez-Artalejo F, Guallar-Castillón P. Ultra-Processed Food Consumption Is  
401 Associated with Abdominal Obesity: A Prospective Cohort Study in Older Adults.  
402 Nutrients. 2020;12:2368.
- 403 31. Yang Q, Zhang Z, Steele EM, Moore LV, Jackson SL. Ultra-Processed Foods and Excess  
404 Heart Age Among U.S. Adults. Am J Prev Med. 2020;59:e197-206.
- 405 32. Nardocci M, Polsky JY, Moubarac J-C. Consumption of ultra-processed foods is  
406 associated with obesity, diabetes and hypertension in Canadian adults. Can J Public Health.  
407 2021;112:421-9.
- 408 33. Pan American Health Organization. Ultra-processed food and drink products in Latin  
409 America: Trends, impact on obesity, policy implications. Washington, DC: PAHO; 2015.
